# Supplementary material
Source: PubMed Central journal article supplement (PMC8457040)
Supplement: NIHMS1739291-supplement-9.pdf [file NIHMS1739291-supplement-9.pdf]

## SUPPLEMENTARY INFORMATION

- 8 supp figs
- 1 supp table

Supp Fig. 1 is related to main Fig. 1

Supp Fig. 2 is related to main Fig. 2

Supp Fig. 3 is related to main Fig. 3

Supp Fig. 4 is related to main Fig. 4

Supp Fig. 5 is related to main Fig. 5

Supp Fig. 6 is related to main Fig. 6

Supp Fig. 7 is related to main Fig. 7

Supp Fig. 8 is related to main Fig. 8

**Figure S1, related to Figure 1**

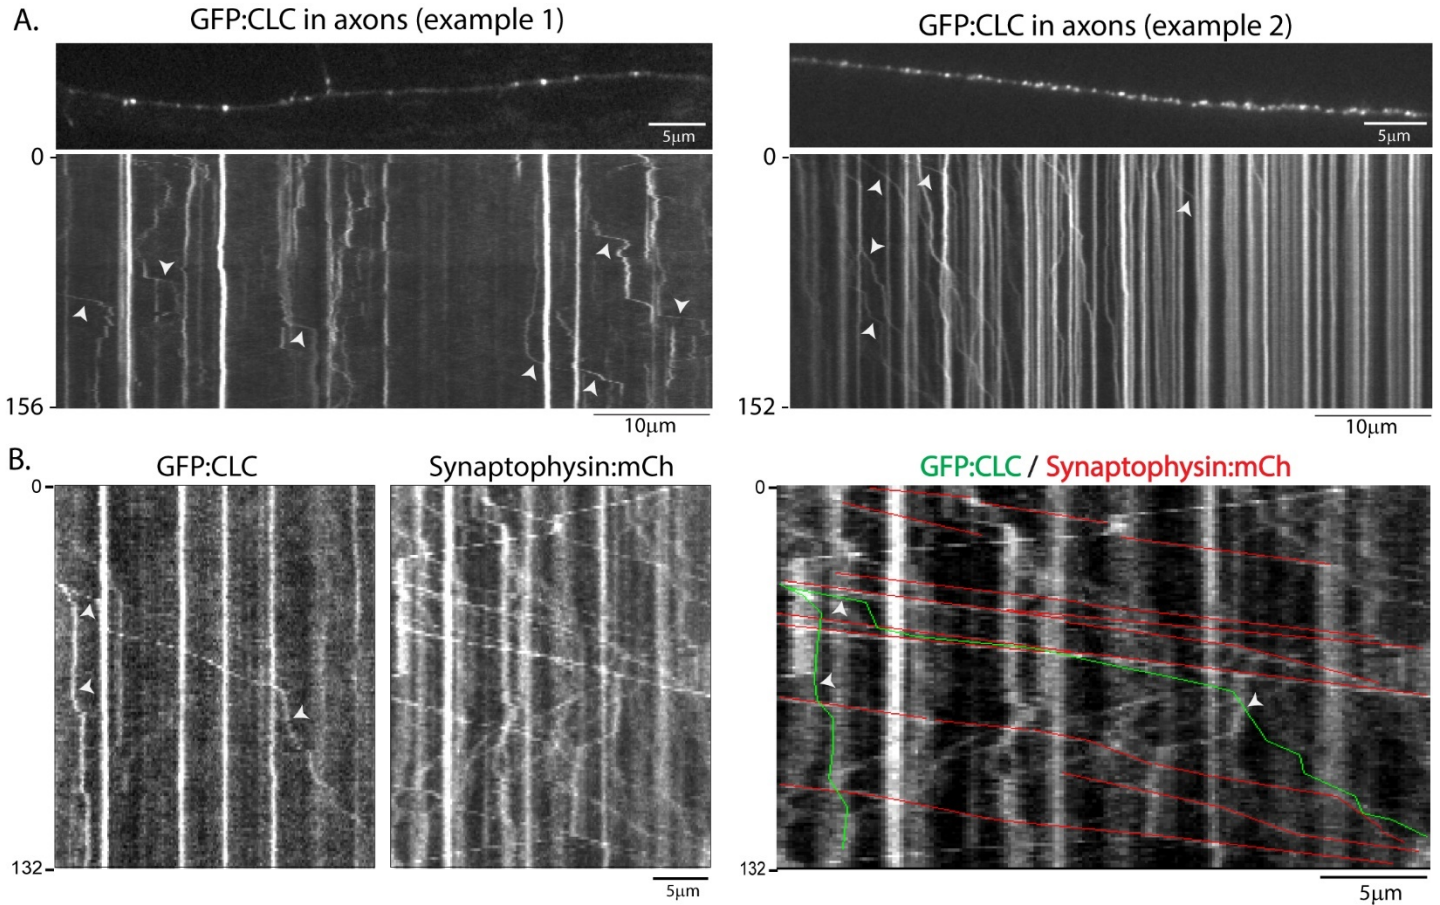

**Figure S1: Axonal clathrin dynamics.**

- (A) Two examples of GFP:CLC dynamics in axons (image of axon on top, kymograph at bottom). Unlike dendrites, blinking (on/off) dynamics are rare in axons, and a fraction of particles move intermittently (arrowheads). Example 1 shows an axon with lower density of clathrin particles and example 2 shows an axon with higher particle density. Note that stationary and moving particles are seen in both cases.
- (B) Kymographs from dual-imaging of GFP:CLC and synaptophysin:mCherry (left), with overlaid tracks (right). The movement of clathrin transport-packets was much less frequent than the fast transport of synaptophysin-vesicles. Though the extensive movement of synaptophysin made definitive conclusions difficult, we could see clear instances where clathrin-packets were transported independently of synaptophysin – see overlaid clathrin (green) and synaptophysin (red) tracks in kymograph below.

Time in seconds to the left of kymographs, and scale bar on lower right.

## Figure S2, related to Figure 2

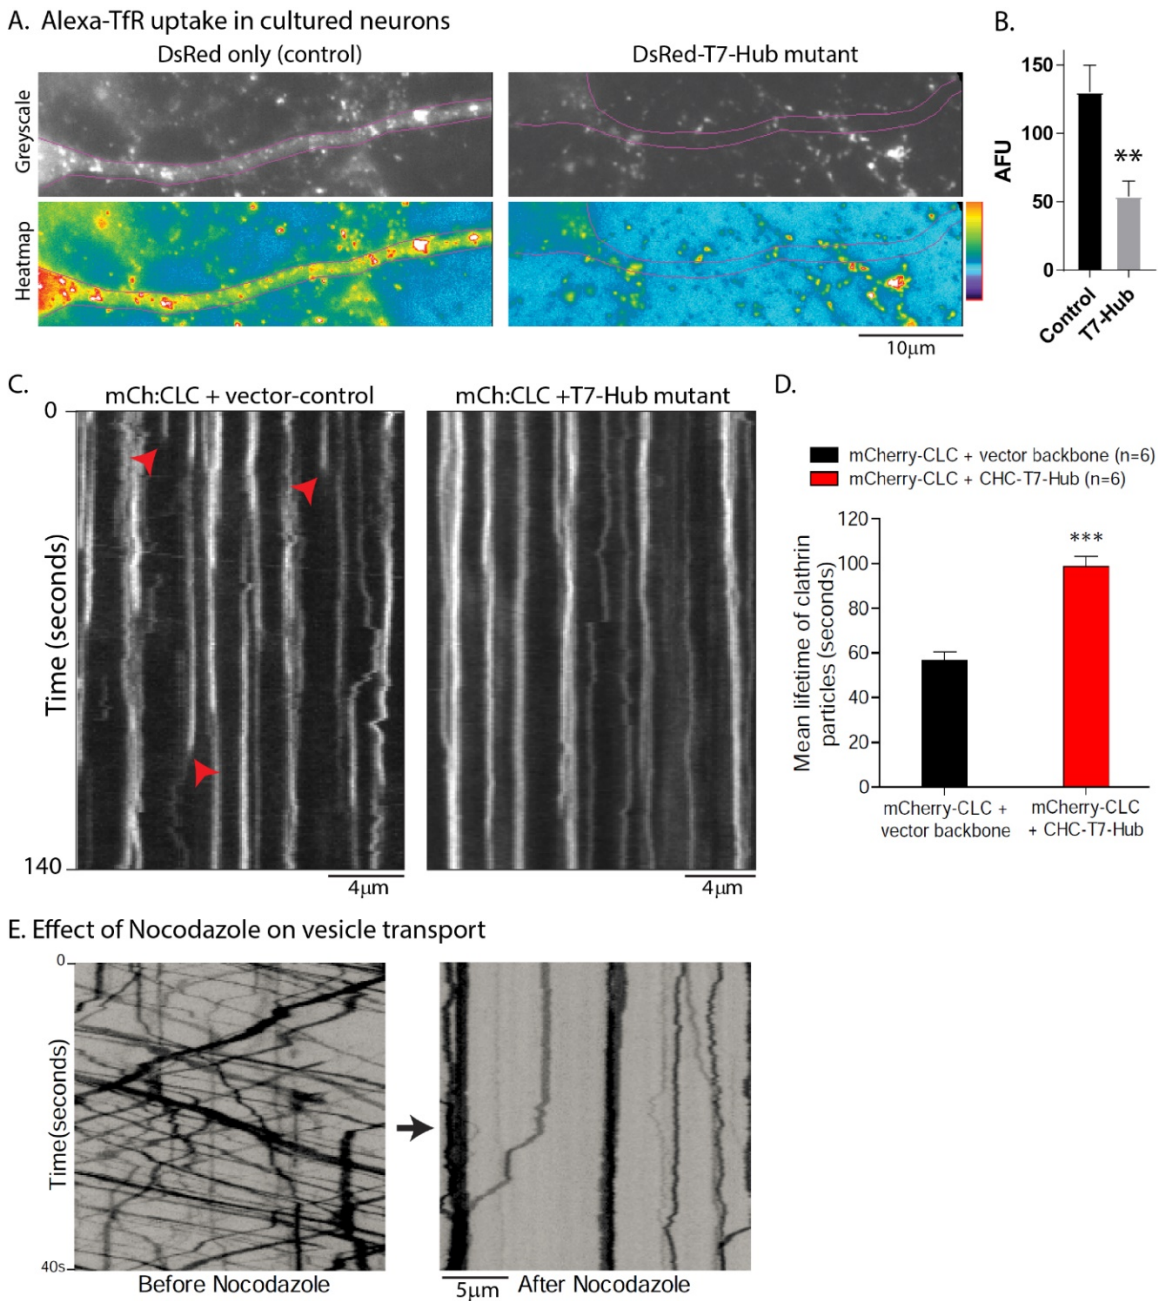

### **Figure S2: The clathrin T7-Hub mutant blocks receptor mediated endocytosis.**

- (A) Neurons were transfected with T7-Hub mutant (DsRed-tagged) or vector-control (DsRed-only), and Alexa-488-transferrin uptake into the transfected neurons was analyzed. As evident in the representative greyscale images (above) and pseudocolor heatmaps (below), the T7-Hub mutant attenuates transferrin-uptake. Data quantified in (B), 5-6 neurons per condition, from one culture; \*\* $p < 0.001$ .
- (C) Kymographs showing dynamics of mCh:CLC in dendrites co-transfected with the T7-Hub mutant (or vector control). Note that the blinking of clathrin fluorescence – due to receptor mediated endocytosis, some marked by arrowheads – is essentially abolished in the T7-Hub transfected neurons.
- (D) Quantification of mCh:CLC lifetime in dendrites (100-150 particles from 6 dendrites were analyzed; \*\*\* $p < 0.0001$ ).
- (E) Kymographs showing movement of the pan-vesicle marker NPYss:mCherry (see Ganguly et al., 2015) in an axon before and after 10µg/ml Nocodazole for 30 min. Note complete stoppage of vesicle transport after adding the microtubule depolymerizing agent.

Time in seconds to the left of kymographs, and scale bar on lower right.

**Figure S3, related to Figure 3**

A.

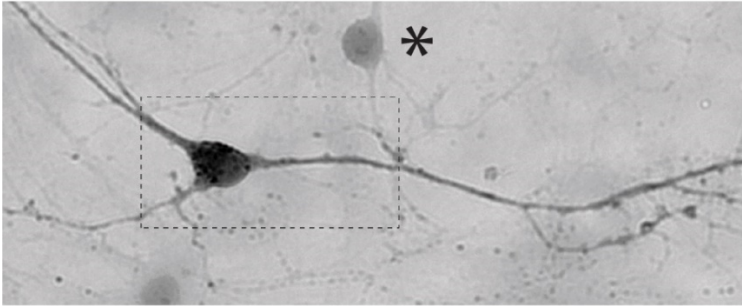

B.

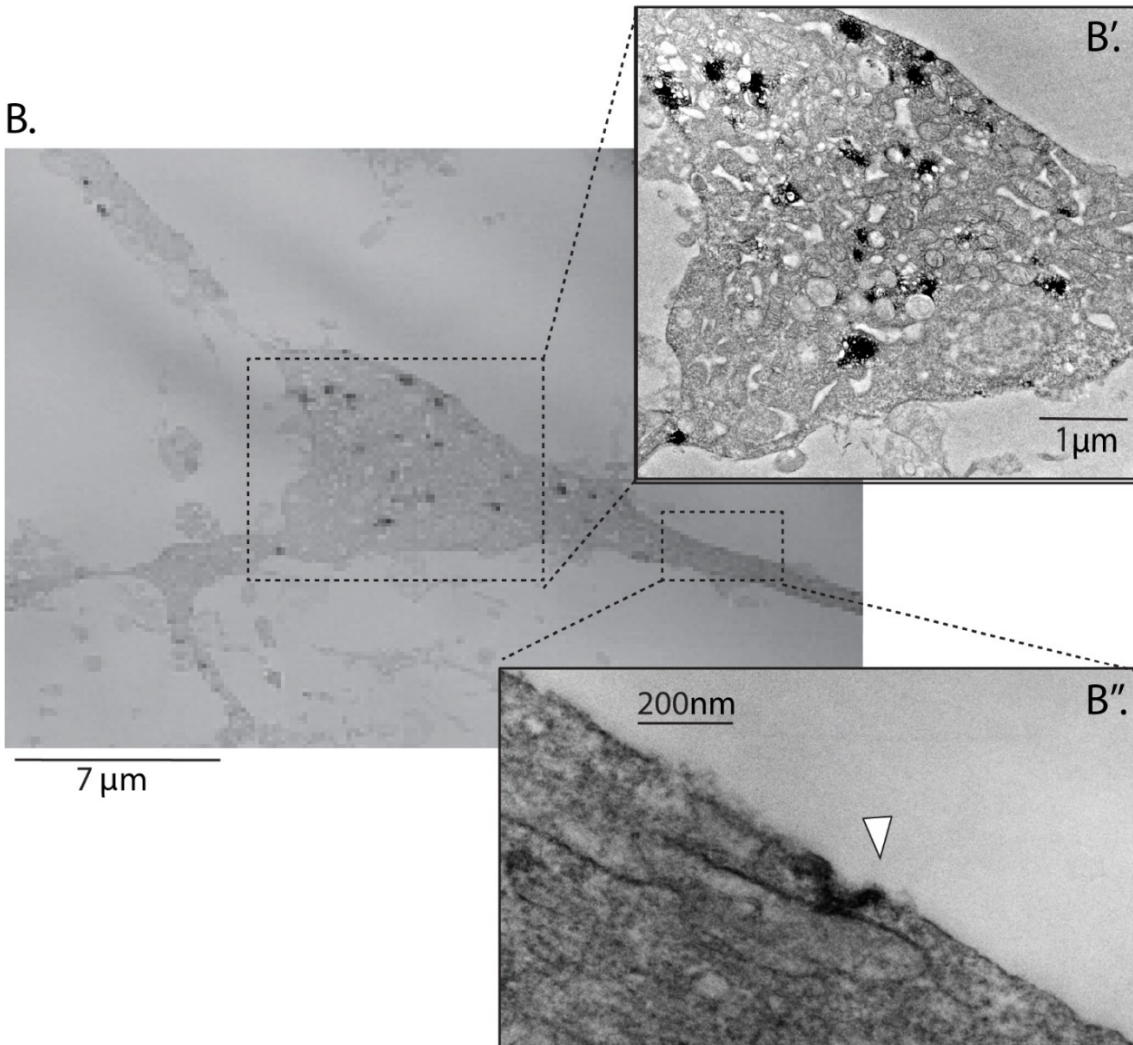

**Figure S3: Apex-clathrin labeling and EM.**

- (A) Neurons were transfected with Apex:GFP:CLC and processed for EM. Gridded coverslips were used to identify transfected neurons for EM processing, as described in methods. The DAB signal from an Apex:GFP:CLC transfected neuron is shown, along with an adjacent un-transfected neuron (marked with an asterisk).
- (B) EM of rectangular region from (A), dark signals represent clathrin. Note that many clathrin structures are seen in the somatodendritic region (B'), some clearly representing coated clathrin pits (B'').

## Figure S4, related to Figure 4

### A. Fractionation and Co-IP/MudPIT-MS analysis

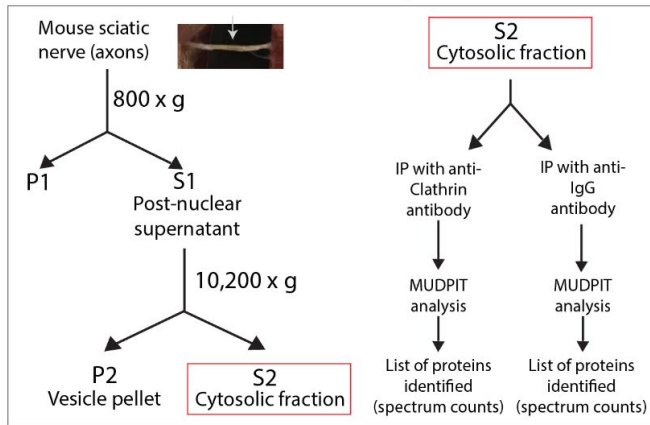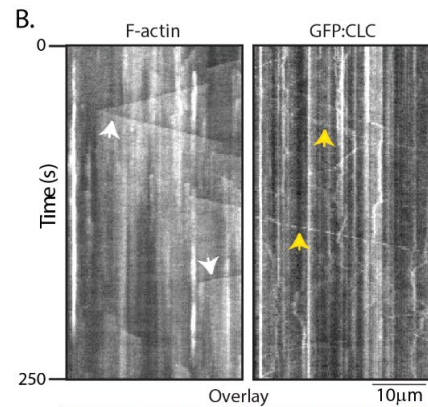

### C. Dynamics of clathrin and GAK in dendrites

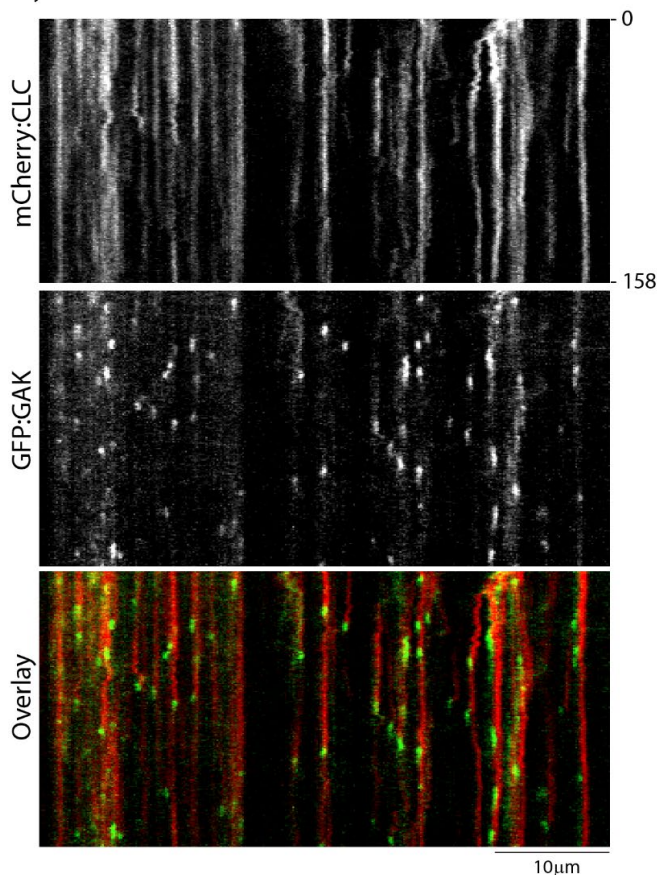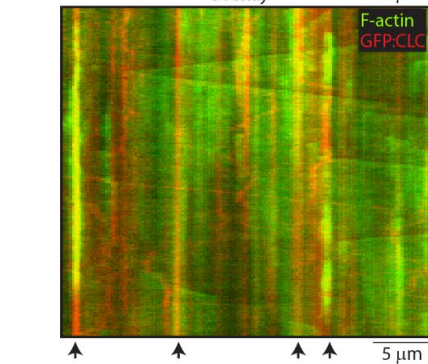

### D. GFP:CLC motility after Hsc70 inhibition

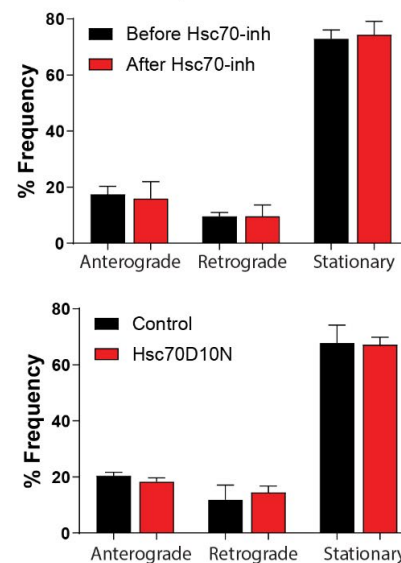

## Figure S4: Composition of axonal clathrin packets.

- (A) Schematic for fractionation and Mudpit-MS. Clathrin was immunoprecipitated from cytosolic (S2) sciatic nerve fractions (dissected from mice, see inset picture and arrow), and associating proteins were identified by MS.
- (B) Kymographs from two-color imaging of GFP:Utr-CH (labeling F-actin) and mCh:CLC – some ‘actin trails’ and clathrin transport-packets are marked by white and yellow arrowheads respectively. On the overlaid red/green kymographs on right, note that many stationary clathrin particles are colocalized with F-actin (black arrowheads, bottom).
- (C) Simultaneous two-color imaging of mCherry:CLC and GFP:GAK in dendrites. Note that GAK particles only appear in kymographs when clathrin is disassembled, consistent with the role of GAK as a protein that dis-assembles clathrin cages. Also note that this behavior of GAK is very different from its dynamics in axons, where many GAK particles colocalize with clathrin and are intermittently transported (**Fig. 4D**).
- (D) Quantification of GFP:CLC particle dynamics in axons before and after pharmacologic inhibition of Hsc70 with a small-molecule (VER155008); or genetic interference of Hsc70 function using a dominant-negative construct (Hsc70D10N). Note that motility of clathrin is unchanged after Hsc70 inhibition.

## Figure S5, related to Figure 5

A. DNA-PAINT of clathrin at presynapses

A': Zoom from inset in (A), used for Fig. 5A

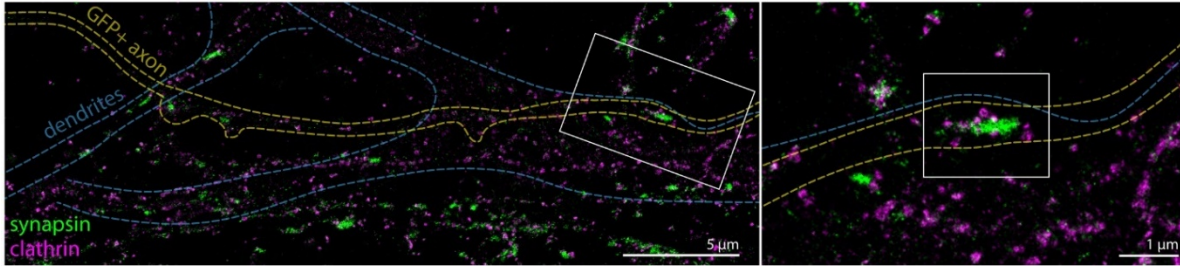

B. Immunogold EM of clathrin

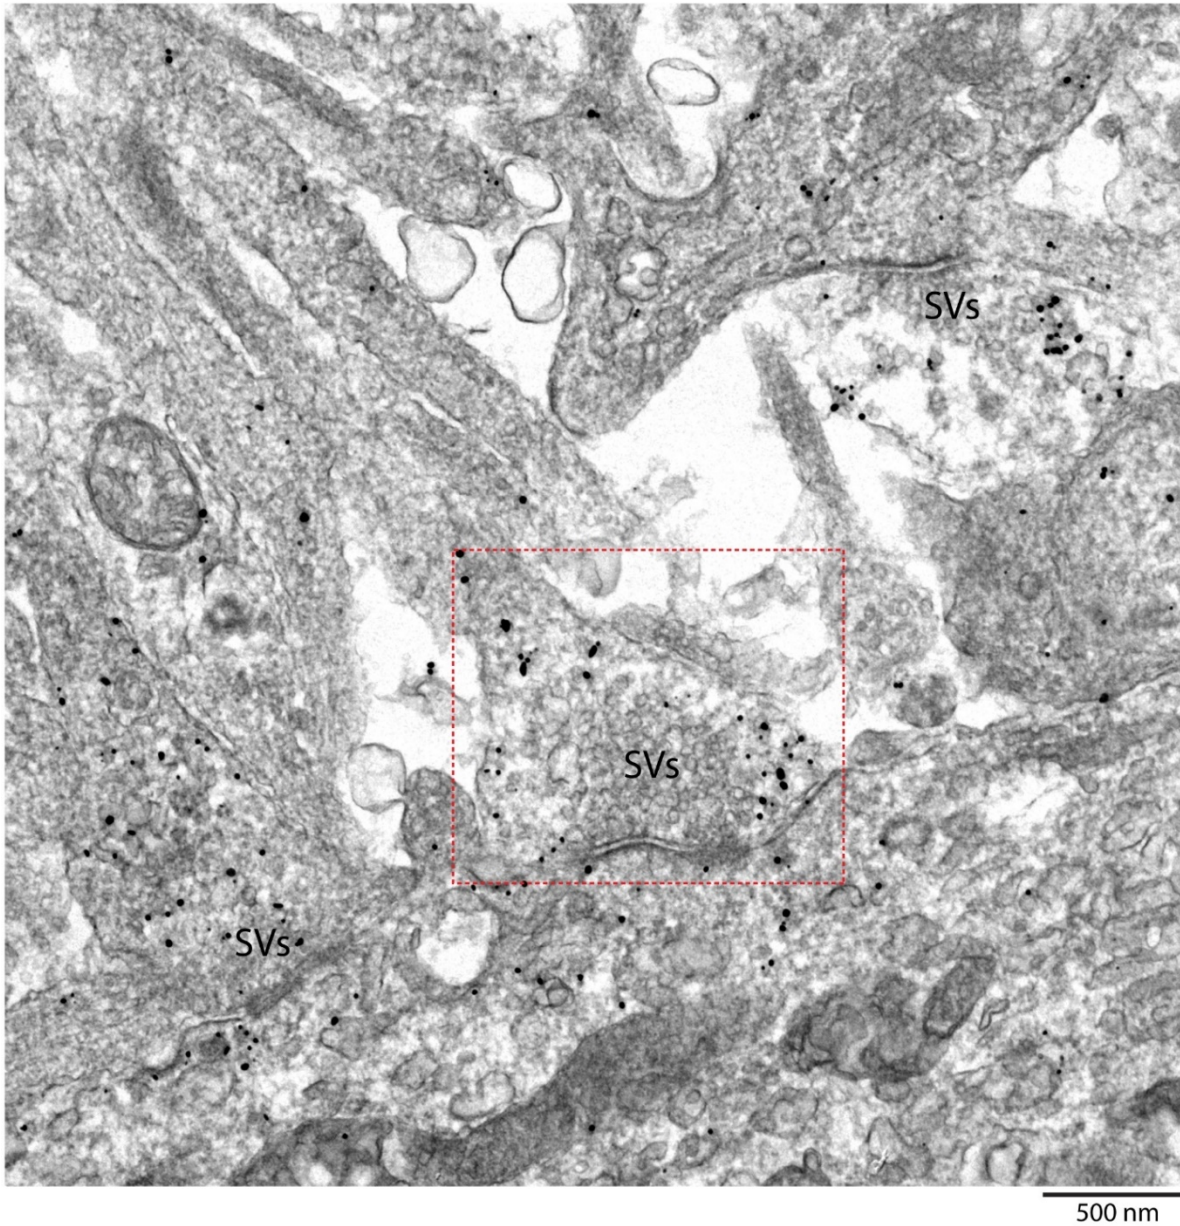

### **Figure S5: Supplements super-resolution and immuno-EM data shown in Fig. 5.**

- (A) DNA-PAINT: Larger field of view showing axons and dendrites corresponding to the bouton shown in **Fig. 5A**. Blue dashed lines represent dendrites (identified by MAP2 staining), and dashed yellow lines represent an axon (identified by Actin:GFP transfection). A' shows the actual image shown in **Fig. 5A**.
- (B) Immuno-EM of clathrin - Large field of view showing synapses and neurites around the synapse showed in **Fig. 5F1** (dashed red box marks ROI used in figure). Note that the immuno-gold particles do not bind to many other structures (tubulo-vesicular organelles, mitochondria, cytoskeletal structures, cytoplasmic matrix, etc.) and appears specific for clathrin.

**Supplementary**

## Figure S6, related to Figure 6

### A. Trafficking of GFP:CLC at synapses

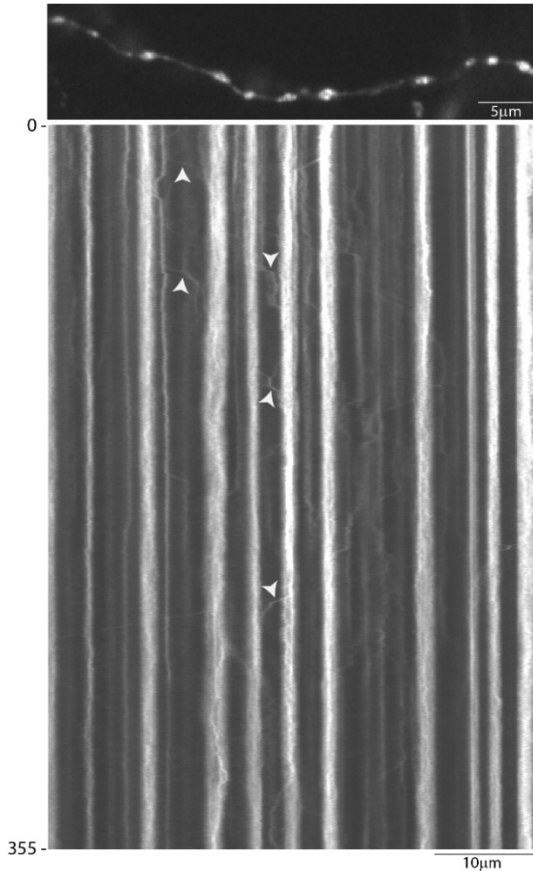

### B. Principle of “pass/trap” analyses (GFP:CLC)

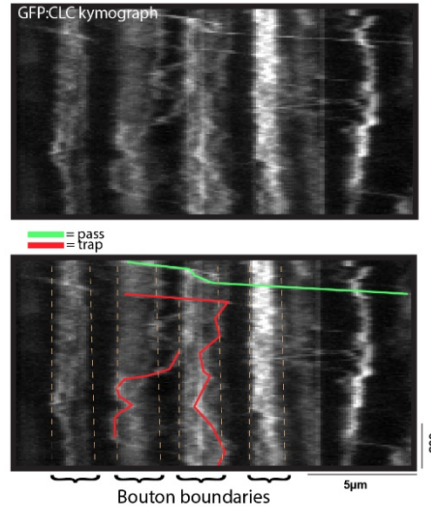

### C. FRAP of synapsin

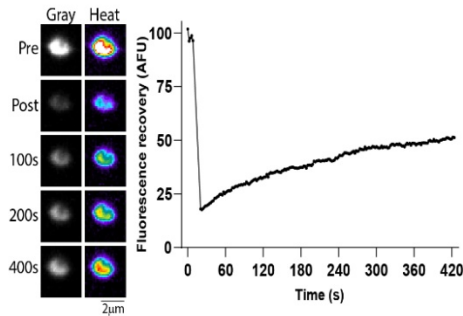

### D. GFP:CLC FRAP at boutons (DIV 14-21)

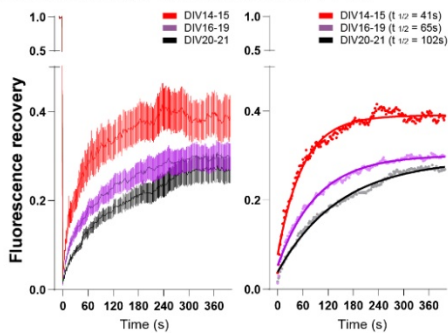

### E. Distribution of endogenous clathrin intensities

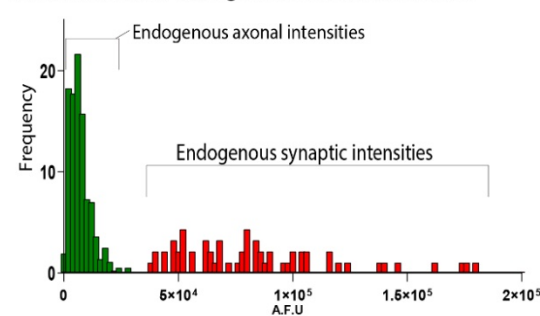

## Figure S6: Trafficking and synaptic targeting of clathrin particles.

- (A) Image (top) and kymograph (bottom) of GFP:CLC trafficking in presynaptic boutons (varicosities) and flanking axons. Note that many clathrin particles are exchanged between boutons. Elapsed time on left, and scale-bar on lower right of kymograph.
- (B) Principle of “pass/trap analysis” to quantify moving clathrin particles trapped at boutons. Moving GFP:CLC (or Dendra2:CLC) particles that did not re-emerge from boutons after 60 seconds were considered trapped. Green and red lines show examples of passing and trapped GFP:CLC particles. Time/scalebar on lower right.
- (C) Time-series grayscale and heatmap images of a bouton containing GFP:synapsin that was photobleached, with corresponding FRAP curve on right (time in seconds shown on left of images). Note the relatively smooth, gradual rise of GFP:synapsin fluorescence after photobleaching.
- (D) FRAP-curves of GFP:CLC from boutons of neurons cultured for 14-21 days in vitro (DIV). Note that there is an earlier flattening of the FRAP-curves with increasing DIV – suggesting a larger immobile pool with age in cultures – likely reflecting synaptic maturity over time (data from 34 neurons, 5 separate cultures for DIV14-15; 51 neurons, 10 separate cultures for DIV16-19; and 44 neurons, 6 separate cultures for DIV20-21). All clathrin photobleaching and photoconversion experiments in main figures were done on DIV 13-14 neurons.
- (E) Intensity distributions (histograms) of endogenous clathrin in axons and synapses, determined by immunostaining cultures with antibody to clathrin heavy chain (to mark synapses, see methods; 355 axonal particles and 92 synapses were analyzed from 2 separate cultures).

## Figure S7, related to Figure 7

### A. Trafficking of photoconverted clathrin particles within boutons

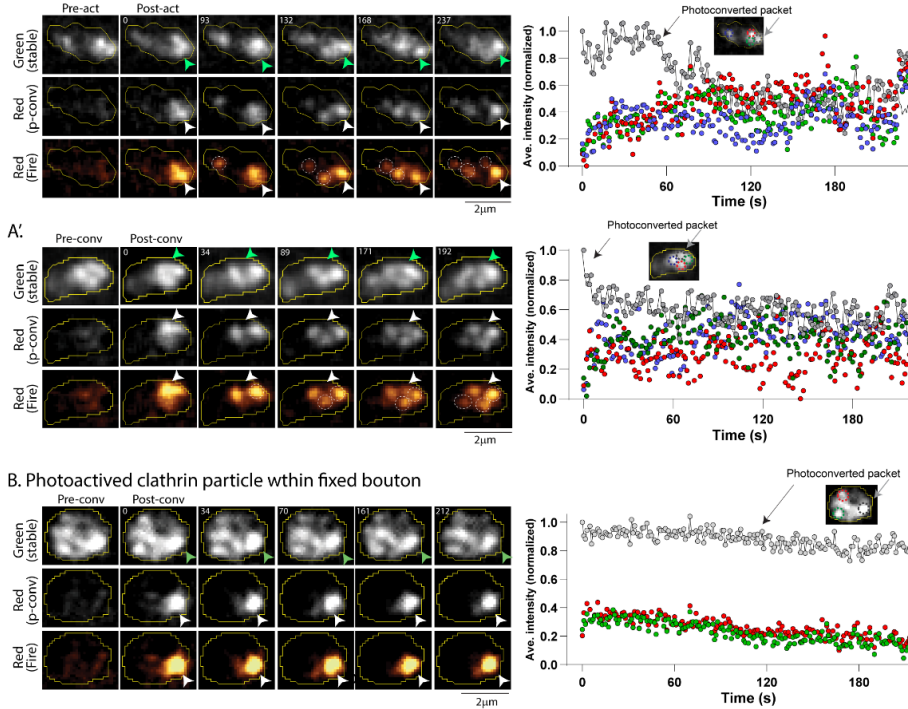

### B. Photoactivated clathrin particle within fixed bouton

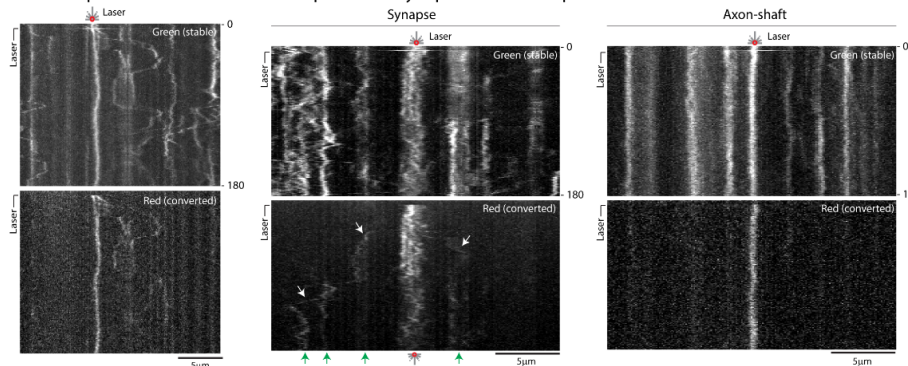

### C. Axonal photoconversion



### D. Comparison of synaptic and axonal photoconversion

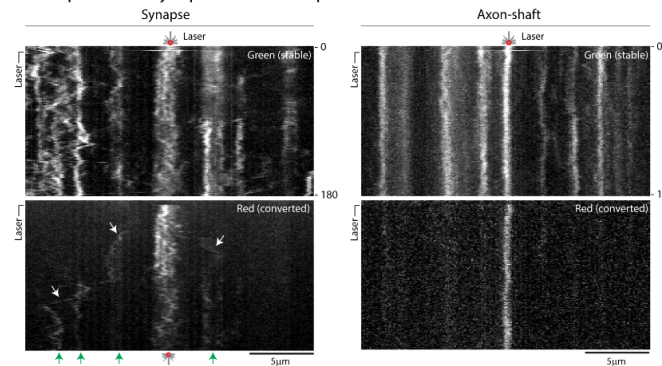

## Figure S7: Photoconversion of single clathrin packets in synapses and axons.

(A, A') Photoconversion of single clathrin-packets (Dendra2:CLC) at presynaptic boutons – two more examples. **Left:** Dendra2:CLC was photoconverted in a single synaptic clathrin-packet (arrowhead, elapsed time in seconds on top left). Note that after photoconversion (middle and bottom panels), the photoconverted packet lost fluorescence, while there was an increase of fluorescence in adjacent packets, identified by stable green fluorescence (some marked by dashed circles in bottom panel). **Right:** Quantification of intensities in individual packets (normalized to highest post-conversion intensity). Colors in graph correspond to the colors of circles marking packets in inset-image. Note reciprocal fluctuations in photoconverted and non-photoconverted packets.

(B) Same experiment as above, but in fixed NEURONS. Note that while the Dendra2:CLC synaptic packet could be photoconverted, there was little to no loss of fluorescence from this packet, or gain of fluorescence in the other local clathrin packets.

(C) Kymographs from photoactivation of single Dendra2:CLC axonal packets. In this example, note that moving clathrin particles caused some disruption of the photoconverted clathrin, but there was no appreciable loss of clathrin molecules from the photoconverted axonal packet. Also note that the time-scale of dispersion in this case – seconds – is very different from the slower exchange of clathrin molecules at the synapse (over tens of seconds to minutes).

(D) A side by side comparison of synaptic and axonal Dendra2:CLC photoconversion. In the kymographs of photoconverted (red) fluorescence, note that in the case of synapses, single particles of clathrin emerged from the laser-illuminated bouton, and were trapped at adjacent boutons (white arrowheads on kymograph; green arrowheads at bottom mark the positions of non-activated boutons, as determined by the stable green fluorescence). On the other hand, no dispersion of fluorescence was seen when a single axonal clathrin-packet was photoconverted.

Key for kymographs: elapsed time in seconds on right and scale-bar on lower right (laser illumination also marked).



## Figure S8, related to Figure 8

### A. FRB-GFP:CLC colocalizes with endogenous clathrin

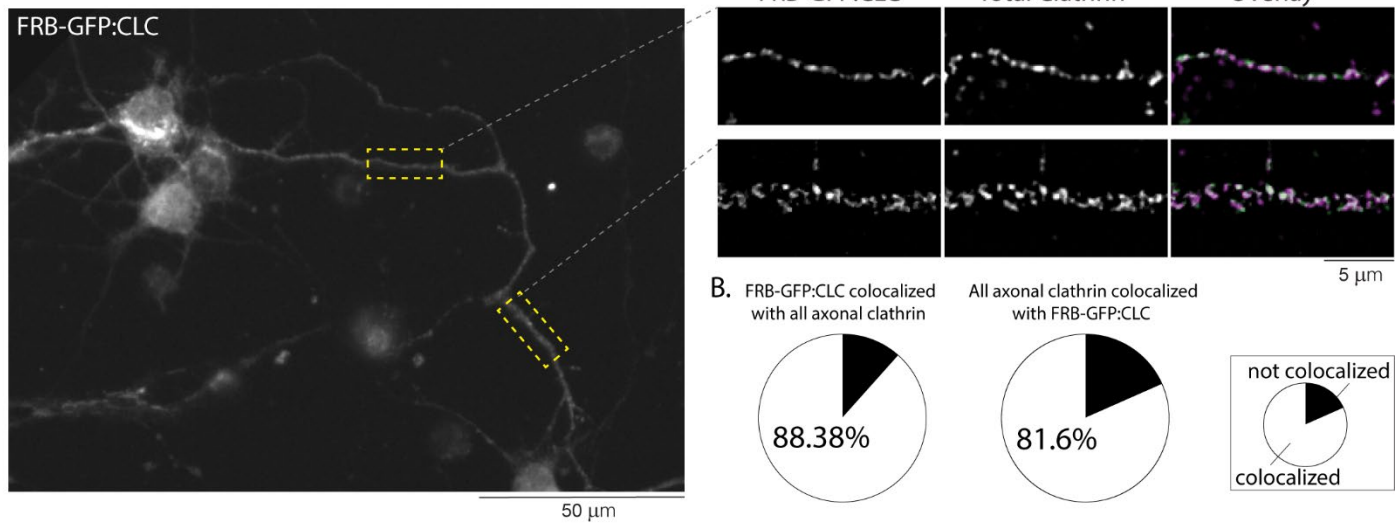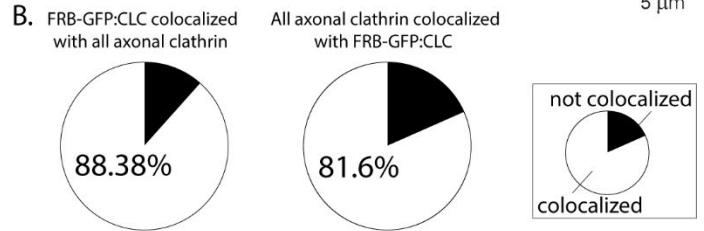

### C. Live/dead assay

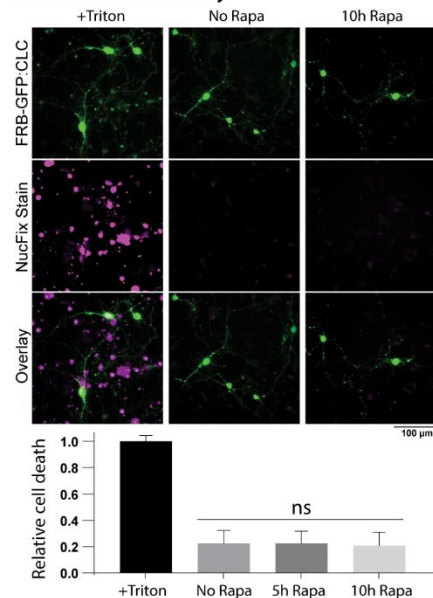

### D. Blocking endocytosis attenuates FM4-64 uptake

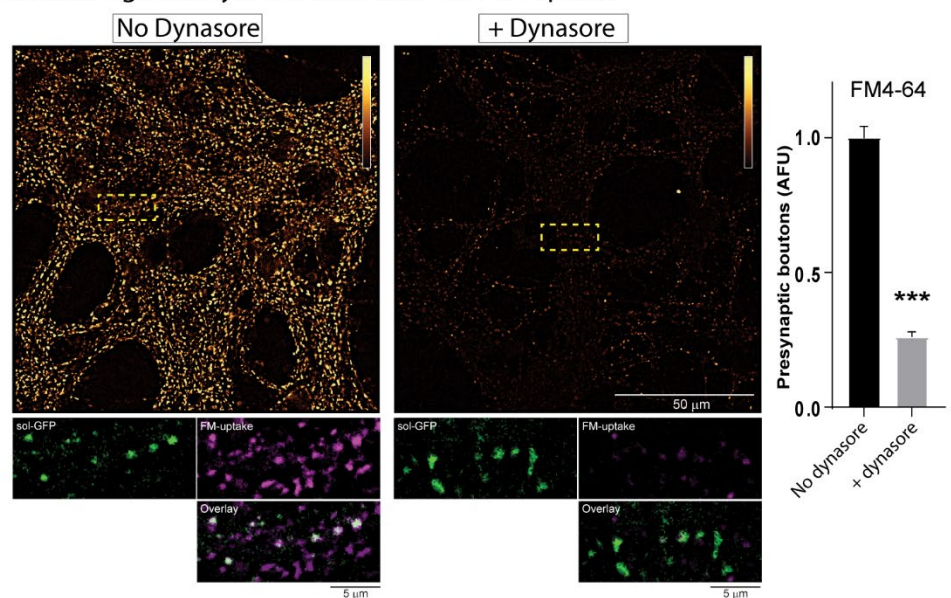

## Figure S8: Transfected FRB-GFP:CLC co-assembles with endogenous clathrin.

- (A) Neurons were transfected with FRB-GFP:CLC and immunostained with an antibody recognizing the clathrin heavy-chain (see ‘methods’). In the insets magnified in A’, note the extensive colocalization of transfected FRB-GFP:CLC with endogenous clathrin.
- (B) Colocalization analysis indicates that the majority of transfected FRB-GFP:CLC (~ 80-90%) co-assembles with the endogenous clathrin in axons (~250 particles were analyzed from 10 neurons).
- (C) Live/dead assay with NucFix stain (see “Methods”) was validated in FRB-GFP:CLC transfected neurons by treating the cells with 0.01% Triton for one minute (left panel). Note that there was no staining above baseline after addition of Rapalogs; quantified at bottom (12-16 fields of neurons were imaged for each condition from two separate cultures).
- (D) Blocking endocytosis by Dynasore led to an attenuation of the FM4-64 dye uptake, as shown in the representative images on left (zoom from boxed regions shown below) and quantification of the data on right. For quantification, boutons were identified by varicosities in neurons transiently transfected with soluble GFP (~240-310 synapses were analyzed for each condition from 3 coverslips).

**Table S1. Proteins associated with clathrin - MUDPIT data (related to Fig. 4)**

| Protein Families                | UniProtKB ID (from MudPIT)                                                             | Gene IDs                                                                             | Organism             |
|---------------------------------|----------------------------------------------------------------------------------------|--------------------------------------------------------------------------------------|----------------------|
| ATP citrate synthase            | Q3V117                                                                                 | Acly                                                                                 | Mus musculus (Mouse) |
| Actin                           | P68134, P60710, Q8BFZ3, P68033                                                         | Acta1, Actb, Actb2, Actc1                                                            | Mus musculus (Mouse) |
| Argonaute                       | Q8CJG0                                                                                 | Ago2                                                                                 | Mus musculus (Mouse) |
| Ahnak2                          | E9PYB0                                                                                 | Ahnak2                                                                               | Mus musculus (Mouse) |
| Adaptor Related Protein Complex | Q8CC13, Q8CBB7, Q3UHH0, P17426, P17427, Q9DBG3, P84091, P62743, Q9Z1T1                 | Ap1b1, Ap1g1, Aak1, Ap2a1, Ap2a2, Ap2b1, Ap2m1, Ap2s1, Ap3b1                         | Mus musculus (Mouse) |
| V-ATPase                        | Q9Z1G4                                                                                 | Atp6v0a1                                                                             | Mus musculus (Mouse) |
| Bag3                            | Q9JLV1                                                                                 | Bag3                                                                                 | Mus musculus (Mouse) |
| Bcr                             | Q6PAJ1                                                                                 | Bcr                                                                                  | Mus musculus (Mouse) |
| Bmp                             | Q91Z96                                                                                 | Bmp2k                                                                                | Mus musculus (Mouse) |
| Calcoco                         | Q8CGU1                                                                                 | Calcoco1                                                                             | Mus musculus (Mouse) |
| Ccdc                            | D3YZP9                                                                                 | Ccdc6                                                                                | Mus musculus (Mouse) |
| Clint1                          | Q5SUH7                                                                                 | Clint1                                                                               | Mus musculus (Mouse) |
| Clathrin                        | Q6IRU5, Q68FD5                                                                         | Cltb, Cltc                                                                           | Mus musculus (Mouse) |
| Alpha-crystallin                | P23927                                                                                 | Cryab                                                                                | Mus musculus (Mouse) |
| Casein                          | P19228, Q02862                                                                         | Csn1s1, Csn1s2a                                                                      | Mus musculus (Mouse) |
| Dab2                            | P98078                                                                                 | Dab2                                                                                 | Mus musculus (Mouse) |
| Conneccenn                      | Q8K382                                                                                 | Dennd1a                                                                              | Mus musculus (Mouse) |
| Dynamin                         | P39053, P39054                                                                         | Dnm1, Dnm2                                                                           | Mus musculus (Mouse) |
| Dynein                          | Q9JHU4                                                                                 | Dync1h1                                                                              | Mus musculus (Mouse) |
| Edc                             | Q3UJB9                                                                                 | Edc4                                                                                 | Mus musculus (Mouse) |
| Eef                             | P58252                                                                                 | Eef2                                                                                 | Mus musculus (Mouse) |
| Epsin                           | Q80VP1, Q5NCM5                                                                         | Epn1, Epn2                                                                           | Mus musculus (Mouse) |
| Eps                             | P42567, Q60902                                                                         | Eps15, Eps151                                                                        | Mus musculus (Mouse) |
| Fatty acid binding protein      | Q05816                                                                                 | Fabp5                                                                                | Mus musculus (Mouse) |
| Fatty Acid Synthase             | P19096                                                                                 | Fasn                                                                                 | Mus musculus (Mouse) |
| Fcho                            | Q3UQN2                                                                                 | Fcho2                                                                                | Mus musculus (Mouse) |
| Fibrinogen A                    | E9PV24                                                                                 | Fga                                                                                  | Mus musculus (Mouse) |
| Filamin A                       | Q8BTM8                                                                                 | Flna                                                                                 | Mus musculus (Mouse) |
| Gak                             | Q99KY4                                                                                 | Gak                                                                                  | Mus musculus (Mouse) |
| Gulp1                           | Q8K2A1                                                                                 | Gulp1                                                                                | Mus musculus (Mouse) |
| H1                              | P15864, P43274                                                                         | H1-2, H1-4                                                                           | Mus musculus (Mouse) |
| Hip1                            | Q8VD75, Q6ZQ77                                                                         | Hip1, Hip1r                                                                          | Mus musculus (Mouse) |
| Hnrnp                           | Q8BG05, Q8VDM6                                                                         | Hnrnpa3, Hnrnpu1                                                                     | Mus musculus (Mouse) |
| Heat shock proteins             | Q80TZ3, Q71LX8, Q8K0U4, Q61696, P16627, P17156, Q3U2G2, P48722, P20029, Q504P4, Q61699 | Dnajc6, Hsp90ab1, Hspa12a, Hspa1a, Hspa11, Hspa2, Hspa4, Hspa4l, Hspa5, Hspa8, Hsph1 | Mus musculus (Mouse) |
| Intersectin                     | E9Q0N0, B2RR82                                                                         | Itsn1, Itsn2                                                                         | Mus musculus (Mouse) |
| Kcp                             | Q3U492                                                                                 | Kcp                                                                                  | Mus musculus (Mouse) |
| Lactate Dehydrogenase           | P16125                                                                                 | Ldhd                                                                                 | Mus musculus (Mouse) |
| Lrp1                            | Q91ZX7                                                                                 | Lrp1                                                                                 | Mus musculus (Mouse) |
| Maged1                          | Q9QYH6                                                                                 | Maged1                                                                               | Mus musculus (Mouse) |
| Map7                            | A2AG50                                                                                 | Map7d2                                                                               | Mus musculus (Mouse) |
| Myosin                          | Q3UH59, Q69ZX3, E9Q174                                                                 | Myh10, Myh11, Myo6                                                                   | Mus musculus (Mouse) |
| Numb                            | Q9QZS3, O08919                                                                         | Numb, Numbl                                                                          | Mus musculus (Mouse) |
| Osbp                            | D3YTT6                                                                                 | Osbp3                                                                                | Mus musculus (Mouse) |
| Pdcd                            | Q9WU78                                                                                 | Pdcd6ip                                                                              | Mus musculus (Mouse) |
| Phgdh                           | Q61753                                                                                 | Phgdh                                                                                | Mus musculus (Mouse) |
| Picalm                          | Q7M6Y3                                                                                 | Picalm                                                                               | Mus musculus (Mouse) |
| Pik3                            | Q61194                                                                                 | Pik3c2a                                                                              | Mus musculus (Mouse) |
| Prune                           | Q52KR3                                                                                 | Prune2                                                                               | Mus musculus (Mouse) |
| Periaxin                        | O55103                                                                                 | Prx                                                                                  | Mus musculus (Mouse) |
| Reps                            | O54916, B9EI38                                                                         | Reps1, Reps2                                                                         | Mus musculus (Mouse) |
| Rundc3a                         | O08576                                                                                 | Rundc3a                                                                              | Mus musculus (Mouse) |
| Sec Failly                      | Q9D1M0, E9QAT4, Q01405                                                                 | Sec13, Sec16a, Sec23a                                                                | Mus musculus (Mouse) |
| Sh3d19                          | Q91X43                                                                                 | Sh3d19                                                                               | Mus musculus (Mouse) |
| Slc12a4                         | Q9JIS8                                                                                 | Slc12a4                                                                              | Mus musculus (Mouse) |
| Snap91                          | Q61548                                                                                 | Snap91                                                                               | Mus musculus (Mouse) |
| Alpha-synuclein                 | O55042                                                                                 | Snca                                                                                 | Mus musculus (Mouse) |
| Sorting nexin                   | Q91VH2                                                                                 | Snx9                                                                                 | Mus musculus (Mouse) |
| Sos1                            | Q62245                                                                                 | Sos1                                                                                 | Mus musculus (Mouse) |
| Spectrin Beta                   | Q62261                                                                                 | Sptbn1                                                                               | Mus musculus (Mouse) |
| Stambpl1                        | Q76N33                                                                                 | Stambpl1                                                                             | Mus musculus (Mouse) |
| Ston2                           | E9PXP7                                                                                 | Ston2                                                                                | Mus musculus (Mouse) |
| Synj1                           | D3Z656                                                                                 | Synj1                                                                                | Mus musculus (Mouse) |
| Tfg                             | Q9Z1A1                                                                                 | Tfg                                                                                  | Mus musculus (Mouse) |
| Tnrc6b                          | Q8BK12                                                                                 | Tnrc6b                                                                               | Mus musculus (Mouse) |
| Tom112                          | Q5SRX1                                                                                 | Tom112                                                                               | Mus musculus (Mouse) |
| Trim21                          | Q3U7K7                                                                                 | Trim21                                                                               | Mus musculus (Mouse) |
| Tubulin                         | P68368, Q9CWF2, Q922F4                                                                 | Tuba4a, Tubb2b, Tubb6                                                                | Mus musculus (Mouse) |
| Ubiquitin C                     | P0CG50                                                                                 | Ubc                                                                                  | Mus musculus (Mouse) |
| Utrophin                        | E9Q6R7                                                                                 | Utrn                                                                                 | Mus musculus (Mouse) |
| Vcp                             | Q01853                                                                                 | Vcp                                                                                  | Mus musculus (Mouse) |

Ybx  
Ywhag  
FLJ45252 homolog

P62960, Q9JKB3  
P61982  
Q6PIU9

Ybx1, Ybx3  
Ywhag  
FLJ45252 homolog

Mus musculus (Mouse)  
Mus musculus (Mouse)  
Mus musculus (Mouse)
